# Supplementary material
Source: HighWire-hosted journal article supplement (https://ijgc.bmj.com/highwire/filestream/30654/field_highwire_adjunct_files/1/ijgc-2023-004555supp002_data_supplement.pdf)
Supplement: ijgc-2023-004555supp002_data_supplement.pdf [file ijgc-2023-004555supp002_data_supplement.pdf]

1 **Table S1 - EORTC QLQ-C30 questionnaire scores over time according to**  
 2 **lymphadenectomy group**

| Scale/Item                       |         | N   | Mean  | SD     | P value |
|----------------------------------|---------|-----|-------|--------|---------|
| Global health status             | SLN     | 112 | 74.25 | ±21.70 | 0.722   |
|                                  | SLN+LND | 39  | 74.64 | ±18.27 |         |
| Global health status 1m          | SLN     | 108 | 77.62 | ±16.65 | 0.109   |
|                                  | SLN+LND | 39  | 72.64 | ±16.10 |         |
| Global health status 6m          | SLN     | 100 | 77.83 | ±18.24 | 0.178   |
|                                  | SLN+LND | 34  | 72.54 | ±23.43 |         |
| Global health_status 12m         | SLN     | 100 | 82.33 | ±17.37 | 0.219   |
|                                  | SLN+LND | 34  | 78.18 | ±15.49 |         |
| Physical functioning general     | SLN     | 112 | 77.36 | ±16.39 | 0.558   |
|                                  | SLN+LND | 39  | 79.09 | ±14.11 |         |
| Physical functioning_general 1m  | SLN     | 108 | 78.34 | ±15.95 | 0.030   |
|                                  | SLN+LND | 39  | 71.70 | ±16.82 |         |
| Physical functioning general 6m  | SLN     | 100 | 82.26 | ±17.83 | 0.088   |
|                                  | SLN+LND | 34  | 76.22 | ±17.14 |         |
| Physical functioning general 12m | SLN     | 100 | 85.03 | ±16.31 | 0.361   |
|                                  | SLN+LND | 34  | 82.18 | ±13.52 |         |
| Physical functioning             | SLN     | 112 | 83.98 | ±19.87 | 0.862   |
|                                  | SLN+LND | 39  | 84.61 | ±17.71 |         |
| Physical functioning 1m          | SLN     | 108 | 78.62 | ±19.25 | 0.412   |
|                                  | SLN+LND | 39  | 76.61 | ±20.57 |         |
| Physical functioning 6m          | SLN     | 100 | 86.26 | ±19.53 | 0.051   |
|                                  | SLN+LND | 34  | 78.62 | ±19.67 |         |
| Physical functioning 12m         | SLN     | 100 | 88.60 | ±17.01 | 0.036   |
|                                  | SLN+LND | 34  | 81.37 | ±17.65 |         |
| Role functioning                 | SLN     | 112 | 86.60 | ±24.07 | 0.309   |
|                                  | SLN+LND | 39  | 82.05 | ±23.68 |         |
| Role functioning 1m              | SLN     | 108 | 79.01 | ±26.01 | 0.032   |
|                                  | SLN+LND | 39  | 68.37 | ±26.98 |         |
| Role functioning 6m              | SLN     | 100 | 80.83 | ±27.04 | 0.051   |
|                                  | SLN+LND | 34  | 74.01 | ±28.48 |         |
| Role functioning 12m             | SLN     | 100 | 83.16 | ±25.12 | 0.360   |
|                                  | SLN+LND | 34  | 80.88 | ±20.56 |         |
| Emotional functioning            | SLN     | 112 | 59.87 | ±27.61 | 0.304   |
|                                  | SLN+LND | 39  | 65.09 | ±26.01 |         |
| Emotional functioning 1m         | SLN     | 108 | 71.06 | ±23.91 | 0.157   |

|                           |         |     |       |        |       |
|---------------------------|---------|-----|-------|--------|-------|
|                           | SLN+LND | 39  | 64.52 | ±26.47 |       |
| Emotional functioning 6m  | SLN     | 100 | 74.77 | ±25.44 | 0.880 |
|                           | SLN+LND | 34  | 74.01 | ±24.25 |       |
| Emotional functioning 12m | SLN     | 100 | 79.08 | ±25.38 | 0.987 |
|                           | SLN+LND | 34  | 79.00 | ±19.82 |       |
| Cognitive functioning     | SLN     | 112 | 79.16 | ±25.65 | 0.981 |
|                           | SLN+LND | 39  | 79.05 | ±21.19 |       |
| Cognitive functioning 1m  | SLN     | 108 | 87.03 | ±20.42 | 0.106 |
|                           | SLN+LND | 39  | 80.76 | ±21.12 |       |
| Cognitive functioning 6m  | SLN     | 100 | 84.00 | ±21.95 | 0.254 |
|                           | SLN+LND | 34  | 78.92 | ±23.32 |       |
| Cognitive functioning 12m | SLN     | 100 | 84.66 | ±21.14 | 0.784 |
|                           | SLN+LND | 34  | 85.78 | ±18.41 |       |
| Social_functioning        | SLN     | 112 | 84.82 | ±22.32 | 0.222 |
|                           | SLN+LND | 39  | 89.74 | ±19.35 |       |
| Social functioning 1m     | SLN     | 108 | 83.48 | ±23.62 | 0.012 |
|                           | SLN+LND | 39  | 71.79 | ±27.07 |       |
| Social functioning 6m     | SLN     | 100 | 86.83 | ±23.24 | 0.011 |
|                           | SLN+LND | 34  | 74.01 | ±29.92 |       |
| Social functioning 12m    | SLN     | 100 | 90.16 | ±19.11 | 0.700 |
|                           | SLN+LND | 34  | 88.72 | ±17.75 |       |
| Symptom scales            | SLN     | 112 | 13.85 | ±14.53 | 0.687 |
|                           | SLN+LND | 39  | 14.93 | ±14.10 |       |
| Symptom scales 1m         | SLN     | 108 | 11.95 | ±12.41 | 0.012 |
|                           | SLN+LND | 39  | 18.13 | ±14.57 |       |
| Symptom scales 6m         | SLN     | 100 | 11.69 | ±15.15 | 0.083 |
|                           | SLN+LND | 34  | 17.04 | ±16.12 |       |
| Symptom scales 12m        | SLN     | 100 | 8.76  | ±9.88  | 0.124 |
|                           | SLN+LND | 34  | 11.91 | ±11.18 |       |
| Fatigue                   | SLN     | 112 | 17.80 | ±22.03 | 0.972 |
|                           | SLN+LND | 39  | 17.94 | ±19.68 |       |
| Fatigue 1m                | SLN     | 108 | 19.44 | ±20.17 | 0.030 |
|                           | SLN+LND | 38  | 28.65 | ±27.29 |       |
| Fatigue 6m                | SLN     | 100 | 16.66 | ±23.45 | 0.038 |
|                           | SLN+LND | 34  | 26.47 | ±23.69 |       |
| Fatigue 12m               | SLN     | 100 | 11.66 | ±15.90 | 0.036 |
|                           | SLN+LND | 34  | 18.62 | ±18.29 |       |
| Nausea vomiting           | SLN     | 112 | 4.46  | ±14.14 | 0.247 |
|                           | SLN+LND | 39  | 7.69  | ±17.03 |       |
| Nausea vomiting 1m        | SLN     | 108 | 1.69  | ±6.42  | 0.056 |

|                     |         |     |       |        |       |
|---------------------|---------|-----|-------|--------|-------|
|                     | SLN+LND | 39  | 5.12  | ±10.22 |       |
| Nausea vomiting 6m  | SLN     | 100 | 4.50  | ±14.38 | 0.221 |
|                     | SLN+LND | 34  | 9.31  | ±20.99 |       |
| Nausea vomiting 12m | SLN     | 100 | 2.16  | ±8.42  | 0.050 |
|                     | SLN+LND | 34  | 8.33  | ±17.04 |       |
| Pain                | SLN     | 112 | 19.94 | ±28.10 | 0.318 |
|                     | SLN+LND | 39  | 25.21 | ±28.83 |       |
| Pain 1m             | SLN     | 108 | 19.90 | ±26.42 | 0.125 |
|                     | SLN+LND | 39  | 27.77 | ±29.69 |       |
| Pain 6m             | SLN     | 100 | 15.83 | ±27.04 | 0.604 |
|                     | SLN+LND | 34  | 18.62 | ±26.51 |       |
| Pain 12m            | SLN     | 100 | 15.50 | ±23.71 | 0.779 |
|                     | SLN+LND | 34  | 14.21 | ±20.56 |       |
| Dyspnoea            | SLN     | 112 | 7.44  | ±18.82 | 0.854 |
|                     | SLN+LND | 39  | 6.83  | ±13.63 |       |
| Dyspnoea 1m         | SLN     | 108 | 3.70  | ±13.92 | 0.826 |
|                     | SLN+LND | 39  | 4.27  | ±13.63 |       |
| Dyspnoea 6m         | SLN     | 100 | 4.66  | ±14.99 | 0.347 |
|                     | SLN+LND | 34  | 7.84  | ±21.08 |       |
| Dyspnoea 12m        | SLN     | 99  | 3.03  | ±10.74 | 0.698 |
|                     | SLN+LND | 34  | 3.92  | ±13.64 |       |
| Insomnia            | SLN     | 112 | 29.46 | ±34.87 | 0.642 |
|                     | SLN+LND | 39  | 26.49 | ±32.87 |       |
| Insomnia 1m         | SLN     | 108 | 22.53 | ±29.11 | 0.682 |
|                     | SLN+LND | 39  | 24.78 | ±30.31 |       |
| Insomnia 6m         | SLN     | 99  | 23.23 | ±30.28 | 0.312 |
|                     | SLN+LND | 34  | 29.41 | ±31.53 |       |
| Insomnia 12m        | SLN     | 98  | 18.36 | ±25.38 | 0.315 |
|                     | SLN+LND | 34  | 23.52 | ±26.62 |       |
| Appetite loss       | SLN     | 111 | 8.40  | ±22.68 | 0.529 |
|                     | SLN+LND | 39  | 5.98  | ±12.95 |       |
| Appetite loss_1m    | SLN     | 106 | 4.08  | ±15.73 | 0.541 |
|                     | SLN+LND | 39  | 5.98  | ±18.53 |       |
| Appetite loss_6m    | SLN     | 100 | 4.66  | ±14.99 | 0.347 |
|                     | SLN+LND | 34  | 7.84  | ±21.80 |       |
| Appetite loss 12m   | SLN     | 100 | 2.33  | ±8.54  | 0.143 |
|                     | SLN+LND | 34  | 5.88  | ±19.19 |       |
| Constipation        | SLN     | 112 | 12.50 | ±23.72 | 0.651 |
|                     | SLN+LND | 39  | 14.52 | ±25.12 |       |
| Constipation 1m     | SLN     | 108 | 5.55  | ±16.11 | 0.001 |

|                            |         |     |       |        |       |
|----------------------------|---------|-----|-------|--------|-------|
|                            | SLN+LND | 39  | 27.35 | ±34.93 |       |
| Constipation 6m            | SLN     | 99  | 8.75  | ±22.63 | 0.109 |
|                            | SLN+LND | 34  | 16.66 | ±29.87 |       |
| Constipation 12m           | SLN     | 99  | 8.41  | ±23.49 | 0.734 |
|                            | SLN+LND | 34  | 6.86  | ±21.36 |       |
| Diarrhoea                  | SLN     | 111 | 5.40  | ±17.13 | 0.815 |
|                            | SLN+LND | 38  | 6.14  | ±15.21 |       |
| Diarrhoea 1m               | SLN     | 107 | 2.80  | ±15.26 | 0.971 |
|                            | SLN+LND | 37  | 2.70  | ±12.11 |       |
| Diarrhoea 6m               | SLN     | 98  | 6.46  | ±17.68 | 0.292 |
|                            | SLN+LND | 34  | 11.76 | ±27.07 |       |
| Diarrhoea 12m              | SLN     | 100 | 3.66  | ±12.44 | 0.198 |
|                            | SLN+LND | 35  | 7.61  | ±16.34 |       |
| Financial_difficulties     | SLN     | 112 | 13.98 | ±28.17 | 0.951 |
|                            | SLN+LND | 39  | 13.67 | ±25.03 |       |
| Financial difficulties 1m  | SLN     | 106 | 14.77 | ±27.63 | 0.651 |
|                            | SLN+LND | 39  | 17.09 | ±26.34 |       |
| Financial difficulties 6m  | SLN     | 98  | 13.94 | ±33.13 | 0.847 |
|                            | SLN+LND | 34  | 12.74 | ±24.63 |       |
| Financial difficulties 12m | SLN     | 98  | 7.48  | ±18.86 | 0.647 |
|                            | SLN+LND | 34  | 5.88  | ±12.89 |       |

3

4 SLN: sentinel lymph node biopsy; LND: lymphadenectomy.
